# Echocardiographic Epicardial Adipose Tissue Is Related to Anthropometric and Clinical Parameters of Metabolic Syndrome: A New Indicator of Cardiovascular Risk

GIANLUCA IACOBELLIS, MARIA CRISTINA RIBAUDO, FILIPPO ASSAEL, ELIO VECCI, CLAUDIO TIBERTI, ALESSANDRA ZAPPATERRENO, UMBERTO DI MARIO, AND FRIDA LEONETTI

*Endocrinology, Department of Clinical Sciences, La Sapienza University, 00161 Rome, Italy; and Radiology Department, Ospedale G. Vannini, Istituto Figlie di S. Camillo (F.A.), 00100 Rome, Italy*

Metabolic syndrome is related to multiple cardiovascular risk factors. Visceral adipose tissue (VAT) plays a key role in metabolic syndrome. Easy detection of VAT could be an important tool to increase knowledge of metabolic syndrome. The objective of this study was to study the relationship of echocardiographic epicardial adipose tissue to anthropometric and clinical parameters of metabolic syndrome. We selected 72 consecutive subjects,  $46.5 \pm 17.4$  yr of age, with a body mass index between 22 and  $47 \text{ kg/m}^2$ . Each subject underwent trans-thoracic echocardiogram to measure epicardial fat thickness on right ventricle and magnetic resonance imaging to calculate visceral adipose tissue. Anthropometric, metabolic, and

cardiac parameters were also evaluated. Echocardiographic epicardial adipose tissue showed a very good correlation with magnetic resonance imaging abdominal VAT and epicardial fat measurement (Bland-Altman plot and linear regression). Multiple regression analysis showed that waist circumference ( $r^2 = 0.428$ ;  $P = 0.01$ ), diastolic blood pressure ( $r^2 = 0.387$ ;  $P = 0.02$ ), and fasting insulin ( $r^2 = 0.387$ ;  $P = 0.03$ ) were the strongest independent variables correlated with epicardial adipose tissue. Echocardiographic epicardial adipose tissue could be applied as an easy and reliable imaging indicator of VAT and cardiovascular risk. (*J Clin Endocrinol Metab* 88: 5163–5168, 2003)

METABOLIC SYNDROME IS related to multiple cardiovascular risk factors (1–3). There are no well-accepted criteria for the diagnosis of metabolic syndrome. Nevertheless, it is identified by the presence of three or more metabolic alterations, such as abdominal obesity, hypertension, impaired fasting glucose or glucose intolerance, high levels of triglycerides, low levels of high-density lipoprotein cholesterol, and insulin resistance (4). Plasma adiponectin and C-reactive protein (CRP) have also been proposed to be related to central adiposity and cardiovascular risk (5–7).

Visceral obesity seems to play a key role in the development of all features of metabolic syndrome (8–15). Hence, detection of visceral adipose tissue (VAT), the fat deposited around the internal organs, might be important for risk stratification of metabolic syndrome. Nevertheless, it is difficult to obtain an accurate measurement and characterization of VAT. Several methods are applied as surrogates for estimation of VAT. Anthropometric measurements are the most used, but are frequently imprecise. However, waist circumference is widely accepted as a good predictor of intraabdominal fat mass (16, 17). Imaging techniques are certainly more precise and reliable than anthropometric measurements. Magnetic resonance imaging (MRI), the gold standard technique, estimates VAT accurately, but unfortunately it is costly (18). Recently, we have proposed and validated a new method to estimate VAT by echocardiographic epicardial

adipose tissue measurement (19). Epicardial adipose tissue is a true visceral fat deposited around the heart with characteristics of a high insulin-resistant tissue. Epicardial adipose tissue measurement could be an important tool to increase knowledge of metabolic syndrome on epidemiological basis.

The aim of this work was to study the relationship of echocardiographic epicardial adipose tissue to anthropometric, metabolic, and cardiac parameters of metabolic syndrome.

## Subjects and Methods

### Subjects

We selected 72 consecutive subjects (Caucasian; 36 females and 36 males),  $46.5 \pm 17.4$  yr of age, with a body mass index (BMI) between 22 and  $47 \text{ kg/m}^2$  (median, 34). Echocardiographic measurements were performed in all subjects during routine examinations. Metabolic syndrome was identified by the presence of three or more of the following parameters: BMI greater than  $30 \text{ kg/m}^2$ , predominant truncal/abdominal fat distribution (value of waist circumference  $>88$  cm in women and  $>102$  cm in men), impaired fasting glucose (fasting glucose  $>110$  mg/dl), hypertension (systolic arterial blood pressure  $>130$  mm Hg and diastolic  $>85$  mm Hg for at least three measurements), high plasma lipids (serum level of total cholesterol  $>220$  mg/dl, HDL cholesterol  $<40$  mg/dl for men and  $<50$  mg/dl for women, LDL  $>130$  mg/dl, and serum level of triglycerides  $>150$  mg/dl). This study was conducted in accordance with the guidelines proposed in the Declaration of Helsinki and has been approved by review committee of La Sapienza University. All subjects gave informed consent before the study began.

### Anthropometric measurements

Weight (to the nearest 0.1 kg) and height (to the nearest 0.5 cm) were measured while the subjects were fasting and wearing only their undergarments. BMI was calculated as body weight divided by height squared and was used as a marker of degree of obesity. Minimum waist circumference (in centimeters; minimum circumference between the

Abbreviations: BMI, Body mass index; CI, confidence interval; CRP, C-reactive protein; CV, coefficient of variation; 2D, two-dimensional; LDL, low-density lipoprotein; LVM, left ventricular mass; MRI, magnetic resonance imaging; SAT, sc adipose tissue; TAT, total adipose tissue; VAT, visceral adipose tissue.

lower rib margin and the iliac crest, midwaist) and maximum hip circumference (in centimeters; the widest diameter over the greater trochanters) were measured while the subjects were standing with their heels together.

### Impedansitometry measurements

Fat mass and fat-free mass were estimated using a bioelectrical impedance analyzer (BIA-103; Akern, Florence, Italy) following the manufacturer's equations, which included data from obese and lean subjects (20).

### Analytical procedures

Plasma glucose was determined by the glucose oxidase method [Autoanalyzer, Beckman Coulter, Inc., Fullerton, CA; coefficient of variation (CV),  $1.9 \pm 0.2\%$ ]. Plasma total cholesterol (CV,  $3.4 \pm 0.2\%$ ), high-density lipoprotein cholesterol (CV,  $3.7 \pm 0.4\%$ ), low-density lipoprotein (LDL) cholesterol (CV,  $3.8 \pm 0.4\%$ ), and triglycerides (CV,  $3.1 \pm 0.5\%$ ) concentrations were measured using enzymatic kits (Ortho-Clinical Diagnostic, Milan, Italy). High sensitivity CRP was measured with the use of latex-enhanced immunonephelometric assays on a BN II analyzer (Dade Behring, Newark, DE; CV,  $4.5 \pm 0.5\%$ ). Blood samples for plasma hormone measurements were collected in heparinized tubes. After centrifugation, plasma insulin (Sorin Biomedical, Milan, Italy; CV,  $3.0 \pm 0.3\%$ ) and leptin (Linco Research, Inc., St. Charles, MO; CV,  $3.7 \pm 0.5\%$ ) concentrations were determined by RIA. To evaluate day by day plasma leptin variations, we measured the plasma leptin concentration at 24-h interval in all subjects. Plasma leptin concentrations had a very small interday variation (mean variation,  $3.4 \pm 0.6\%$ ). The plasma adiponectin concentration were measured by RIA (Linco Research, Inc.; CV,  $4.7 \pm 0.4\%$ ). Samples were diluted 500 times before assay.

### Echocardiographic study

Each subject underwent transthoracic two-dimensional (2D) guided M-mode echocardiogram. Echocardiograms were performed with a SONOLINE instrument (Siemens, New York, NY) by standard techniques with subjects in the left lateral decubitus position. Echocardiograms were recorded on videotape. The echocardiographic study required the recording of 10 or more cycles of 2D parasternal long- and short-axis views and 10 or more cycles of M-mode with optimal cursor beam orientation in each view (21, 22). Echocardiograms were preliminarily read by a first reader and subsequently reread by highly experienced reader. Both readers were blinded to the subjects' anthropometric features. The CV between the two different sonographers was 2.8%, indicating good reproducibility of the echocardiographic measurements. We excluded 2 subjects from 74 initially selected because of nonoptimal technically satisfactory view.

We measured epicardial fat thickness on the free wall of right ventricle from both parasternal long- and short-axis views. We used imaging constraints to make sure that the epicardial fat thickness was not measured obliquely. Measurements on M-mode strips obtained from both 2D views with longitudinal cursor beam orientation in each view were also performed. The maximum values at any site were measured, and the average value was considered. In any case, a very good reliability of epicardial fat thickness measurement from different views occurred (intraclass correlation coefficient, 0.92). Epicardial adipose tissue appears as an echo-free or a hyperechoic space, if it is massive. The measurement of epicardial fat on the right ventricle was chosen for two reasons: 1) this point is recognized as the highest absolute epicardial fat layer thickness (23), and 2) parasternal long- and short-axis views allow the most accurate measurement of epicardial adipose tissue on the right ventricle, with optimal cursor beam orientation in each view.

Hypertrophy of the right ventricle trabecula and moderator band, even if it occurred, did not confound epicardial adipose tissue calculation (23).

Left ventricular mass (LVM) was estimated by using the anatomically validated formula of Devereux *et al.* (24). The index that adjusted LVM was obtained as  $LVM/height^{2.7}$  ( $LVMh^{2.7}$ ) (25, 26). If the 2D-guided M-mode beam could not be optimally oriented, 2D long-axis views were used to obtain linear measurements of LV cavity (LV end-diastolic diameter and LV end-systolic diameter) and walls (interventricular sep-

tum and posterior wall) according to the recommendations of American Society of Echocardiography (22).

### MRI measurements

Each subject underwent MRI of VAT to assess the correlation between echocardiographic epicardial fat and MRI VAT. The MRI studies were performed with a 1.5-T system (Gyrosan ACS-NT 1000, Philips, Eindhoven, The Netherlands) using a body coil for signal transmission and reception. Respiratory triggering was used for the sequences, whereby repetition time was dependent on respiratory frequency. During the examination, patients were not given special breathing commands.

The areas of abdominal VAT, sc (SAT), and total (TAT) adipose tissue were measured at the L4–L5 level. We obtained TFET1-weighted sequences with axial and sagittal orientation, antero-posterior phase-encoding direction, 10-mm-thick section with 1-mm intersection gap, with a 364 field of view and a  $256 \times 256$  matrix. The entire VAT and SAT volumes were measured by MRI while the subjects were lying supine on their abdomens, with arms elevated above the head, as described by Ross *et al.* (18). The SAT and VAT volumes were summed to obtain the TAT volume. Then VAT was calculated as TAT minus SAT. Epicardial adipose tissue scans were obtained by TSET1-weighted sequences with oblique axial orientation for a correct study of the four cardiac chambers, 10-mm-thick section with 1-mm intersection gap, 370 field of view,  $256 \times 256$  matrix. We measured epicardial fat thickness on the free wall of the right ventricle, following the same echocardiographic points and views. The sagittal abdominal diameter was measured at the L4–L5 level. The intraclass correlation for repeated VAT, sagittal abdominal diameter, and epicardial adipose tissue determinations in our laboratory was 0.95.

### Statistical analysis

Data in the text and tables are expressed as the mean  $\pm$  SD. Linear regression analysis was performed on all anthropometric and clinical variables to identify correlates of epicardial adipose tissue, and variables found to be  $P < 0.1$  by univariate analysis were entered into a stepwise multiple linear regression analysis to determine their independent relationship to epicardial adipose tissue. A Mann-Whitney *U* test with 95% confidence interval (CI) was applied to evaluate the differences between men and women. A Kruskal-Wallis test with 95% CI was used to evaluate the differences among the groups of patients with different conditions of fat tissue distribution in men and women, respectively. To assess the agreement between MRI and echocardiographic measurements, we used the method described by Bland and Altman. Two-tailed  $P < 0.05$  indicated statistical significance. Analysis was performed using Stata 5.0 (Stata Corp., College Station, TX).

## Results

### Subject characteristics

The main anthropometric and clinical characteristics of the subjects studied are summarized in Table 1.

### Echocardiographic study of epicardial adipose tissue

The thickness of the epicardial adipose tissue on the right ventricle varies between 1.8 and 16.5 mm. Subjects with predominant visceral fat accumulation and at least two clinical and metabolic parameters of metabolic syndrome showed higher epicardial adipose tissue than subjects with predominant peripheral fat distribution and no clinical or metabolic alterations [ $9.87 \pm 2.55$  vs.  $4.12 \pm 1.67$  (95% CI, 4.06–7.18;  $P < 0.01$ ) and  $7.58 \pm 3.02$  vs.  $3.13 \pm 1.87$  (95% CI, 2.19–5.76;  $P < 0.01$ ) in men and women, respectively]. No significant differences in age and BMI among subjects with predominant visceral fat accumulation and subjects with peripheral fat occurred.

**TABLE 1.** Body composition and clinical parameters in men and women

|                           | Men (n = 36) | Women (n = 36) | P    |
|---------------------------|--------------|----------------|------|
| Age (yr)                  | 48.2 ± 13.7  | 45.8 ± 15.7    | NS   |
| BMI (kg/m <sup>2</sup> )  | 33.8 ± 13.7  | 34.3 ± 15.4    | NS   |
| Waist (cm)                | 107.7 ± 15.8 | 104.8 ± 15.1   | NS   |
| FM (kg)                   | 42.3 ± 15.7  | 38.3 ± 21.5    | NS   |
| FFM (kg)                  | 53.8 ± 17.2  | 45.0 ± 17.2    | NS   |
| Epicardial fat (cm)       | 7.60 ± 3.55  | 6.94 ± 3.71    | NS   |
| Syst BP (mm Hg)           | 138.8 ± 18.6 | 137.7 ± 15.9   | NS   |
| Diast BP (mm Hg)          | 88.6 ± 9.0   | 87.9 ± 8.0     | NS   |
| Glucose (mg/dl)           | 98.2 ± 18.6  | 98.5 ± 19.9    | NS   |
| Insulin (μIU)             | 20.5 ± 12.7  | 19.8 ± 14.5    | NS   |
| Leptin (ng/ml)            | 19.4 ± 11.5  | 26.4 ± 13.5    | 0.01 |
| Adiponectin (mg/liter)    | 9.4 ± 6.5    | 15.9 ± 6.7     | 0.03 |
| Total cholesterol (mg/dl) | 191.8 ± 44.6 | 189.5 ± 42.4   | NS   |
| HDL (mg/dl)               | 38.6 ± 10.4  | 40.2 ± 10.8    | NS   |
| LDL (mg/dl)               | 121 ± 15.4   | 121.4 ± 14.7   | NS   |
| Triglycerides (mg/dl)     | 148 ± 54.6   | 140 ± 53.2     | NS   |
| CRP (mg/liter)            | 2.8 ± 1.6    | 2.0 ± 1.7      | 0.05 |
| Fibrinogen (mg/dl)        | 178 ± 50.4   | 165 ± 57.5     | NS   |

Data are presented as the mean ± SD.

Waist circumference (Waist), fat mass (FM), and fat free mass (FFM) were measured by the BIA method; systolic blood pressure (Syst BP), diastolic blood pressure (Diast BP), fasting glucose (Glucose), fasting insulin (Insulin), fasting leptin (Leptin), total cholesterol, high density lipoprotein cholesterol (HDL), LDL cholesterol (LDL), and CRP were also determined.

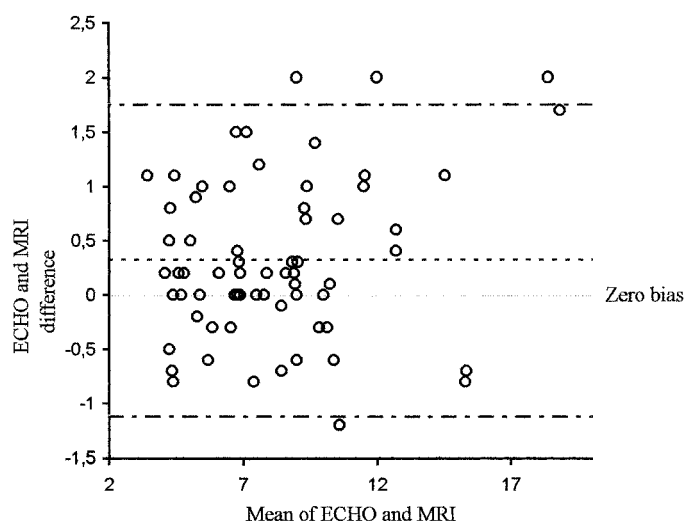

FIG. 1. Bland-Altman plot regression showed a very good agreement of echocardiographic epicardial adipose tissue with MRI epicardial fat measurement.

#### Anthropometric correlates of epicardial adipose tissue

Bland-Altman plot regression showed a very good agreement of echocardiographic epicardial adipose tissue with MRI epicardial fat measurement (Fig. 1).

In a simple linear regression analysis, MRI epicardial fat, waist circumference, and MRI VAT showed an excellent correlation with epicardial adipose tissue obtained from the echocardiogram (Table 2). Epicardial adipose tissue was also related to BMI and fat mass. No correlation among age, MRI SAT, and epicardial adipose tissue measurement was found. Multiple regression analysis confirmed that waist circumference and MRI VAT were the strongest independent variables related to epicardial adipose tissue (Table 2).

**TABLE 2.** Anthropometric correlates of echocardiographic epicardial adipose tissue

|                    | Simple regression analysis |       |
|--------------------|----------------------------|-------|
|                    | r                          | P     |
| MRI epicardial fat | 0.91                       | 0.001 |
| Waist              | 0.845                      | 0.01  |
| MRI VAT            | 0.840                      | 0.01  |
| BMI                | 0.567                      | 0.05  |
| FM                 | 0.455                      | 0.03  |
| Hip                | 0.433                      | 0.09  |
| Sex                | 0.342                      | 0.10  |
| Age                | 0.219                      | 0.14  |

  

|         | Multiple regression analysis |      |                        |
|---------|------------------------------|------|------------------------|
|         | t                            | P    | r <sup>2</sup> = 0.428 |
| Waist   | 2.69                         | 0.01 |                        |
| MRI VAT | 2.48                         | 0.01 |                        |
| BMI     | 1.53                         | 0.05 |                        |
| FM      | 0.78                         | 0.10 |                        |

Waist, Waist circumference; FM, fat mass calculated by BLA.

#### Correlates of MRI VAT

Taking into account echocardiographic epicardial fat and waist circumference as measures of VAT, MRI VAT was correlated better with the echocardiographic measurement than with waist circumference ( $r = 0.840$ ,  $P = 0.01$ ; and  $r = 0.750$ ,  $P = 0.02$ , respectively; Fig. 2).

#### Cardiac and metabolic correlates of epicardial adipose tissue

Simple linear regression analysis showed a good correlation among diastolic blood pressure, fasting insulin, and epicardial adipose tissue (Table 3 and Fig. 3). Epicardial fat was also related to LDL cholesterol, plasma adiponectin, glucose, high-density lipoprotein cholesterol, and systolic blood pressure. No correlation between epicardial adipose tissue measurement and triglycerides, leptin, LVM, CRP, fibrinogen, heart rate, uric acid, and microalbuminuria was found.

Multiple regression analysis confirmed that diastolic blood pressure and fasting insulin were the strongest independent variables correlated with epicardial adipose tissue (Table 3).

#### Discussion

Our data showed that epicardial adipose tissue measured by echocardiography is related to the main anthropometric and clinical parameters of metabolic syndrome. In fact, we found a very good correlation between epicardial adipose tissue and waist circumference, diastolic blood pressure, fasting plasma insulin, LDL cholesterol, and plasma adiponectin. Moreover, echocardiographic calculation of epicardial fat was easily reproducible and showed an excellent reliability with the MRI epicardial and visceral adipose tissue measurements. Echocardiographic assessment of visceral fat could be an easy method to indicate patients with high cardiovascular risk.

Recent studies suggested that visceral fat may be an independent predictor of metabolic risk (26–28). These observations supported the growing interest in a better definition



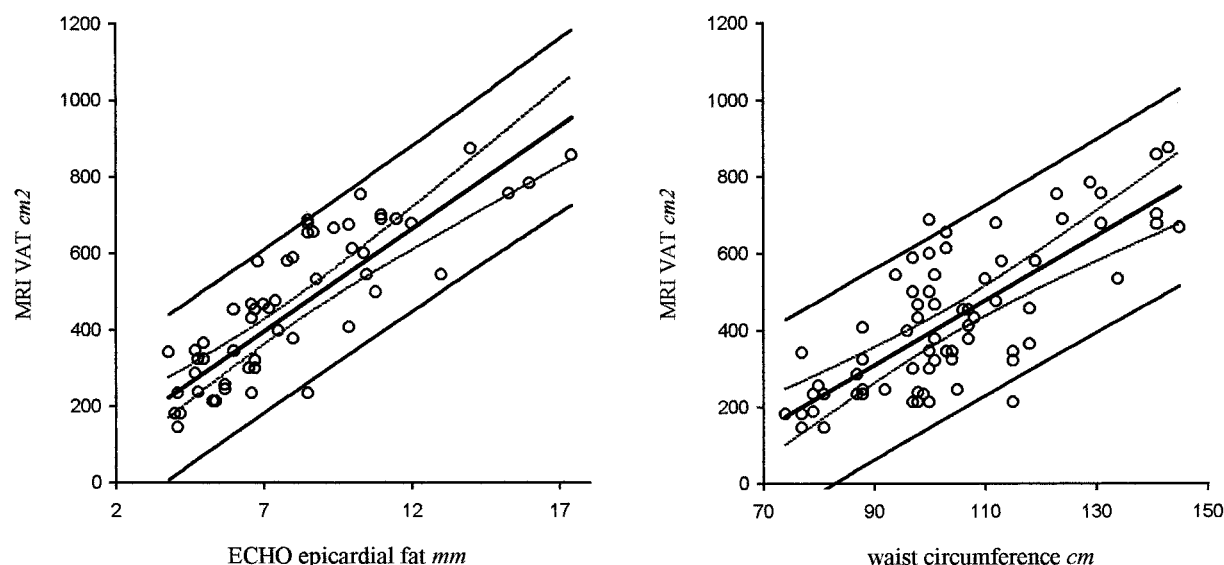

FIG. 2. Taking into account echocardiographic epicardial fat and waist circumference as measures of VAT, MRI VAT was correlated better with the echocardiographic measurement than with waist circumference ( $r = 0.840$ ;  $P = 0.01$  and  $r = 0.750$ ;  $P = 0.02$ , respectively).

TABLE 3. Metabolic correlates of epicardial adipose tissue

|                 | Simple regression analysis <sup>a</sup> |       |        |               |
|-----------------|-----------------------------------------|-------|--------|---------------|
|                 | Men                                     |       | Women  |               |
|                 | r                                       | P     | r      | P             |
| Diast BP        | 0.745                                   | 0.001 | 0.744  | 0.001         |
| Insulin         | 0.698                                   | 0.01  | 0.695  | 0.01          |
| LDL             | 0.600                                   | 0.02  | 0.594  | 0.02          |
| Adiponectin     | -0.535                                  | 0.03  | -0.590 | 0.02          |
| Glucose         | 0.518                                   | 0.03  | 0.522  | 0.04          |
| HDL             | -0.507                                  | 0.04  | -0.510 | 0.04          |
| Syst BP         | 0.384                                   | 0.05  | 0.388  | 0.05          |
| Triglycerides   | 0.386                                   | 0.06  | 0.377  | 0.06          |
| CRP             | 0.358                                   | 0.06  | 0.359  | 0.07          |
| Leptin          | 0.379                                   | 0.11  | 0.397  | 0.10          |
| LVM             | 0.381                                   | 0.13  | 0.354  | 0.14          |
| Fibrinogen      | 0.210                                   | 0.16  | 0.211  | 0.16          |
|                 | Multiple regression analysis            |       |        | $r^2 = 0.387$ |
|                 | t                                       | P     |        |               |
| Diast BP        | 2.67                                    | 0.02  |        |               |
| Insulin         | 2.00                                    | 0.03  |        |               |
| LDL cholesterol | 1.31                                    | 0.06  |        |               |
| Adiponectin     | -1.20                                   | 0.06  |        |               |
| HDL cholesterol | -1.14                                   | 0.07  |        |               |
| Glucose         | 1.13                                    | 0.09  |        |               |
| Syst BP         | 0.98                                    | 0.10  |        |               |
| Tryglicerides   | 0.86                                    | 0.11  |        |               |
| CRP             | 0.80                                    | 0.11  |        |               |

Glucose, Fasting glucose; Insulin, fasting insulin; Syst BP, systolic blood pressure; Diast BP, diastolic blood pressure; HDL, high-density lipoprotein.

<sup>a</sup> Taking into account gender.

of imaging studies of adipose tissue (29). In fact, imaging measurements provide a more accurate quantification of adipose tissue and multicompartiment body fat distribution than simple anthropometric indexes (30, 31). Particularly, ultrasound procedure has been reported to be an excellent method for visceral abdominal fat prediction, with the great advantage of being less expensive and less invasive than MRI and computed tomography techniques (32). In the present

study, epicardial fat showed a correlation with abdominal VAT higher or similar to that with ultrasound intraabdominal thickness reported in previous studies (32–34). In addition, we validated our echocardiographic measurements by MRI, which is considered the gold standard technique for VAT estimation.

Epicardial adipose tissue is a true visceral fat tissue, deposited around the heart on the free wall of the right ventricle and on the left ventricular apex, but also around the atria. Obesity seems to be a predisposing factor for the accumulation of excess epicardial fat (23). Nevertheless, our data suggest that body fat distribution, particularly abdominal fat tissue, is more strongly correlated to epicardial fat. A possible common pathway during embryogenesis could explain this finding. In fact, epicardial fat and intraabdominal fat seem to be originally in brown adipose tissue in infancy. The biochemical proprieties of epicardial adipose tissue suggest its possible role as a cardiovascular and metabolic risk indicator. In fact, it was reported that in young adult guinea pigs the rate of free fatty acid release by epicardial adipose tissue was twice that of the perirenal fat depots, indicating increased lipolytic activity (35). This is probably due to several mechanisms: the antilipolytic effect of insulin is low in VAT;  $\beta$ -adrenergic receptors, especially  $\beta_3$ -receptors, are increased; and their stimulation activates lipolysis (36). The correlation of LDL cholesterol, fasting insulin, adiponectin, and arterial blood pressure with epicardial fat thickness in our subjects seems to support these observations. The relationship of epicardial fat to plasma insulin and adiponectin levels strongly suggests that it should be considered a highly insulin-resistant adipose tissue. In fact, subjects with impaired insulin sensitivity and lower adiponectin levels, independently from BMI, showed the highest epicardial fat thickness. In addition, recent observations reported that mRNA expression of resistin, a novel adipocyte-secreted factor strongly linked with insulin resistance, is increased in human epicardial fat (37). In the consolidate conviction that insulin resistance together with visceral obesity are the major de-

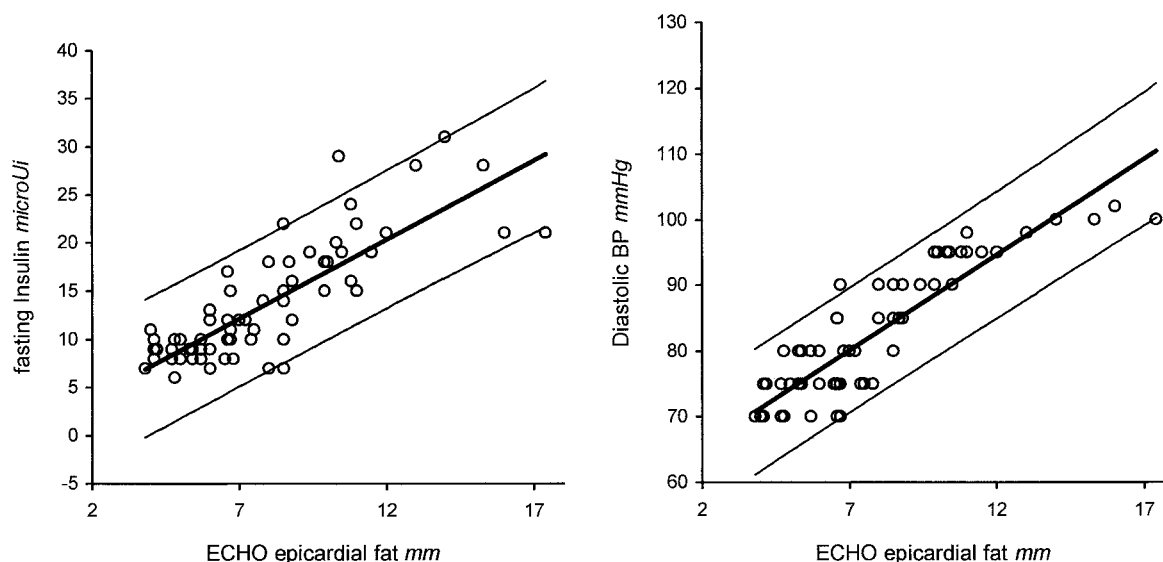

FIG. 3. Simple linear regression analysis showed a good correlation among diastolic blood pressure, fasting insulin, and epicardial adipose tissue.

terminants of metabolic syndrome, this imaging indicator of visceral fat could be useful and appropriate. The good correlation of epicardial fat with diastolic blood pressure can be intuitively inserted and explained in the context of physiological mechanisms of insulin resistance syndrome. In fact, the link among insulin resistance, visceral fat, and hypertension is well known (8–10, 13, 14). Finally, epicardial fat does not seem to be influenced by age, and previous autopsical studies confirmed our data (23).

In the present study, MRI VAT was correlated better with echocardiographic epicardial fat than with waist circumference. We believe that this is an important issue in favor of this new method. Although waist circumference is widely accepted as a marker of adverse metabolic profile and high cardiovascular risk, it can be confounded by large amounts of sc fat, particularly in severely obese subjects. Echocardiographic measurement of VAT would not be affected by this. In fact, we can obtain a true VAT measurement, avoiding the possible confounding effect of increased sc abdominal fat thickness.

This may also explain the advantage of echocardiography over other ultrasound abdominal fat measurements. Our finding seems to support the observation that this echocardiographic measure could be a good imaging predictor of visceral fat mass and could justify its higher cost compared with a simpler measure, such as waist circumference. In any case, echocardiography requires lower costs than existing methodologies, such as MRI and computed tomography, also providing data on cardiac parameters that can be useful in the clinical management of patients with metabolic syndrome.

Furthermore, echocardiography could have its greatest utility as a less expensive method for precise quantification of visceral fat for research and risk stratification purposes. We suggest that echocardiographic epicardial adipose tissue could be applied as an easy and reliable imaging indicator of cardiovascular risk. Further investigations with a larger pop-

ulation will be necessary to create threshold values of mild and severe visceral fat deposition.

### Acknowledgments

Received April 21, 2003. Accepted July 16, 2003.

Address all correspondence and requests for reprints to: Gianluca Iacobellis, M.D., Ph.D., Clinica Medica 2, Dipartimento di Scienze Cliniche, Policlinico Umberto I, Viale del Policlinico 155, 00161 Rome, Italy. E-mail: gianluca.iaco@tin.it.

### References

1. Reaven GM 1988 Role of insulin resistance in human disease. *Diabetes* 37: 1595–1607
2. DeFronzo RA, Ferrannini E 1991 Insulin resistance: a multifaceted syndrome responsible for NIDDM, obesity, hypertension, dyslipidemia, and atherosclerotic cardiovascular disease. *Diabetes Care* 14:173–194
3. Haffner S, Valdez R, Hazuda H, Mitchell B, Morales P, Stern M 1992 Prospective analysis of the insulin-resistance syndrome (syndrome X). *Diabetes* 41:715–722
4. National Cholesterol Education Program (NCEP) Expert Panel on Detection, Evaluation, and Treatment of High Blood Cholesterol in Adults (Adult Treatment Panel III) 2002 Third Report of the National Cholesterol Education Program (NCEP) Expert Panel on Detection, Evaluation, and Treatment of High Blood Cholesterol in Adults (Adult Treatment Panel III) final report. *Circulation* 106:3143–3421
5. Funahashi T, Nakamura T, Shimomura I, Maeda K, Kuriyama H, Takahashi M, Arita Y, Kihara S, Matsuzawa Y 1999 Role of adipocytokines on the pathogenesis of atherosclerosis in visceral obesity. *Intern Med* 38:202–206
6. Ridker PM, Rifai N, Rose L, Buring JE, Cook NR 2002 Comparison of C-reactive protein and low-density lipoprotein cholesterol levels in the prediction of first cardiovascular events. *N Engl J Med* 347:1557–1565
7. Engeli S, Feldpausch M, Gorzelniak K, Hartwig F, Heintze U, Janke J, Möhlig M, Pfeiffer AF, Luft FC, Sharma AM 2003 Association between adiponectin and mediators of inflammation in obese women. *Diabetes* 52: 942–947
8. Albu JB, Kovera AJ, Johnson JA 2000 Fat distribution and health in obesity. *Ann NY Acad Sci* 904:491–501
9. Doll S, Paccaud F, Bovet P, Burnier M, Wietlisbach V 2002 Body mass index, abdominal adiposity and blood pressure: consistency of their association across developing and developed countries. *Int J Obes Relat Metab Disord* 26:48–57
10. Visscher TL, Seidell JC, Molarius A, van der Kuip D, Hofman A, Witteman JC 2001 A comparison of body mass index, waist-hip ratio and waist circumference as predictors of all-cause mortality among the elderly: the Rotterdam study. *Int J Obes Relat Metab Disord* 25:1730–1735
11. Rexrode KM, Carey VJ, Hennekens CH, Walters EE, Colditz GA, Stampfer

- MJ, Willett WC, Manson JE 1998 Abdominal adiposity and heart disease in women. *JAMA* 280:1843–1848
12. Rexrode KM, Buring JE, Manson JE 2001 Abdominal and total adiposity and risk of coronary heart disease in men. *Int J Obes Relat Metab Disord* 25:1047–1056
  13. Folsom AR, Kushi LH, Anderson KE, Mink PJ, Olson JE, Hong CP, Sellers TA, Lazovich D, Prineas RJ 2000 Associations of general and abdominal obesity with multiple health outcomes in older women: the Iowa Women's Health Study. *Arch Intern Med* 160:2117–2128
  14. Peiris AN, Sothmann MS, Hoffmann RG, Hennes MI, Wilson CR, Gustafson AB, Kissebah AH 1989 Adiposity, fat distribution, and cardiovascular risk. *Ann Intern Med* 110:867–872
  15. Nakamura T, Tokunaga K, Shimomura I, Nishida M, Yoshida S, Kotani K, Islam AH, Keno Y, Kobatake T, Nagai Y 1994 Contribution of visceral fat accumulation to the development of coronary artery disease in non-obese men. *Atherosclerosis* 107:239–246
  16. Wei M, Gaskill SP, Haffner SM, Stern MP 1997 Waist circumference as the best predictor of noninsulin dependent diabetes mellitus (NIDDM) compared to body mass index, waist/hip ratio and other anthropometric measurements in Mexican Americans: a 7-year prospective study. *Obes Res* 5:16–23
  17. van der Kooy K, Leenen R, Seidell JC, Deurenberg P, Visser M 1993 Abdominal diameters as indicators of visceral fat: comparison between magnetic resonance imaging and anthropometry. *Br J Nutr* 70:47–58
  18. Ross R, Leger L, Morris D, de Guise J, Guardo R 1992 Quantification of adipose tissue by MRI: relationship with anthropometric variables. *J Appl Physiol* 72:787–795
  19. Iacobellis G, Assael F, Ribaldo MC, Zappaterreno A, Alessi G, Di Mario U, Leonetti F 2003 Epicardial fat from echocardiography: a new method for visceral adipose tissue prediction. *Obes Res* 11:304–310
  20. Lukasky HZ, Johnson PE, Bolonchuk WW, Lykken GI 1985 Assessment of fat free mass using bioelectrical impedance measurements of human body. *Am J Clin Nutr* 41:180
  21. Schiller NB, Shah PM, Crawford M, DeMaria A, Devereux R, Feigenbaum H, Gutgesell H, Reichek N, Sahn D, Schnittger I 1989 Recommendations for quantitation of the left ventricle by two-dimensional echocardiography. *J Am Soc Echocardiogr* 2:358–367
  22. Sahn D, DeMaria A, Kisslo J, Weyman A 1978 The Committee on M-mode standardization of the American society of Echocardiography: recommendations regarding quantitation in M-mode echocardiography: results of a survey of echocardiography measurements. *Circulation* 58:1072–1083
  23. Schejbal V 1989 Epicardial fatty tissue of the right ventricle morphology, morphometry and functional significance. *Pneumologie* 43:490–499
  24. Devereux RB, Alonso DR, Lutas EM, Gottlieb GJ, Campo E, Sachs I, Reichek N 1986 Echocardiographic assessment of left ventricular hypertrophy: comparison to necropsy findings. *Am J Cardiol* 57:450–458
  25. de Simone G, Daniels SR, Devereux RB, Meyer RA, Roman MJ, de Divitiis O, Alderman MH 1992 Left ventricular mass and body size in normotensive children and adults: assessment of allometric relations and impact of overweight. *J Am Coll Cardiol* 20:1251–1260
  26. de Simone G, Devereux RB, Daniels SR, Koren MJ, Meyer RA, Laragh JH 1995 Effect of growth on variability of left ventricular mass: assessment of allometric signals in adults and children and their capacity to predict cardiovascular risk. *J Am Coll Cardiol* 25:1056–1062
  27. Janssen I, Heymsfield SB, Allison DB, Kotler DP, Ross R 2002 Body mass index and waist circumference independently contribute to the prediction of nonabdominal, abdominal subcutaneous, and visceral fat. *Am J Clin Nutr* 75:683–688
  28. Nguyen-Duy TB, Nichaman MZ, Church TS, Blair SN, Ross R 2003 Visceral fat and liver fat are independent predictors of metabolic risk factors in men. *Am J Physiol* 10:E1152
  29. Boyko EJ, Fujimoto WY, Leonetti DL, Newell-Morris L 2000 Visceral adiposity and risk of type 2 diabetes: a prospective study among Japanese Americans. *Diabetes Care* 23:465–471
  30. Shen W, Wang Z, Punyanita M, Lei J, Sinav A, Kral JG, Imielinska C, Ross R, Heymsfield SB 2003 Adipose tissue quantification by imaging methods: a proposed classification. *Obes Res* 11:5–16
  31. Asayama K, Dobashi K, Hayashibe H, Koderu K, Uchida N, Nakane T, Araki T, Nakazawa S 2002 Threshold values of visceral fat measures and their anthropometric alternatives for metabolic derangement in Japanese obese boys. *Int J Obes Relat Metab Disord* 26:208–213
  32. Wajchenberg BL 2000 Subcutaneous and visceral adipose tissue: their relation to the metabolic syndrome. *Endocr Rev* 21:697–738
  33. Tornaghi G, Raiteri R, Pozzato C, Rispoli A, Bramani M, Cipolat M, Craveri A 1994 Anthropometric or ultrasonic measurements in assessment of visceral fat? A comparative study. *Int J Obes* 18:771–775
  34. Armellini F, Zamboni M, Rigo L, Todesco T, Bergamo-Andreis IA, Procacci C, Bosello O 1990 The contribution of sonography to the measurement of intra-abdominal fat. *J Clin Ultrasound* 18:563–567
  35. Marchington JM, Mattacks CA, Pond CM 1989 Adipose tissue in the mammalian heart and pericardium: structure, foetal development and biochemical properties. *Comp Biochem Physiol B* 94:225–232
  36. Bjorntorp P 1991 Metabolic implications of body fat distribution. *Diabetes Care* 14:1132–1143
  37. Lauer MN, McTernan PG, Quinlan DW, McTernan CL, Harte AL, Barnett AH, Bosner RS, Kumar S, AGT, PAI and resistin gene expression in human epicardial fat. 38th Annual Meeting of the European Association for the Study of Diabetes, Budapest, Hungary, 2000, OP017, 100 (Abstract)
